# Supplementary material
Source: Springer Nature journal article supplement (https://www.springermedizin.de/resource/supplementary/13075_2011_3215_MOESM4_ESM.pdf/9694012)

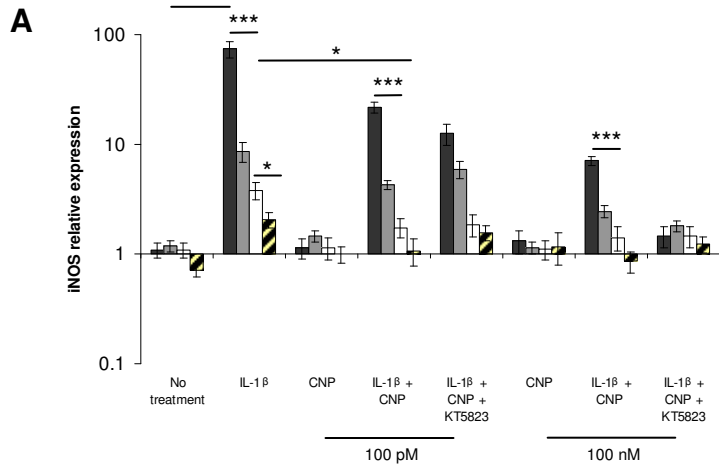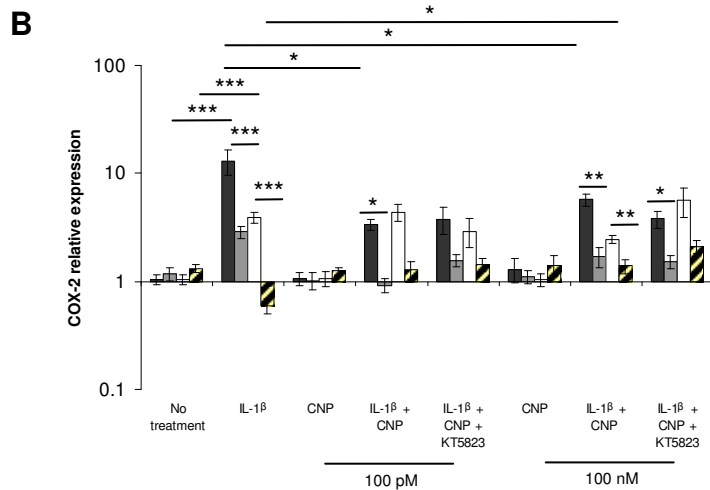

6 hour | ■ Unstrained  
 | ■ Strained

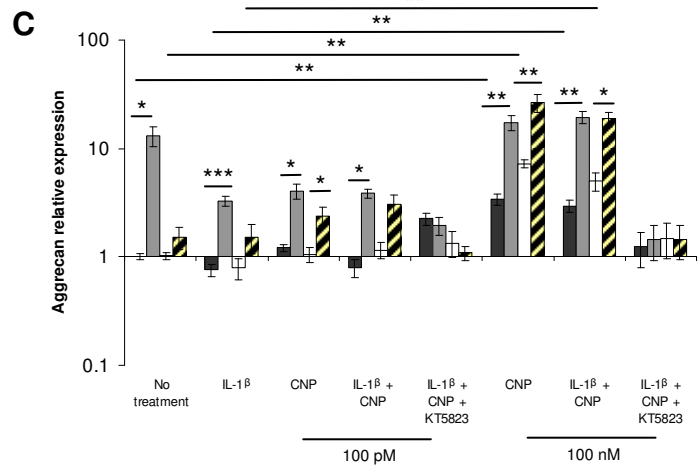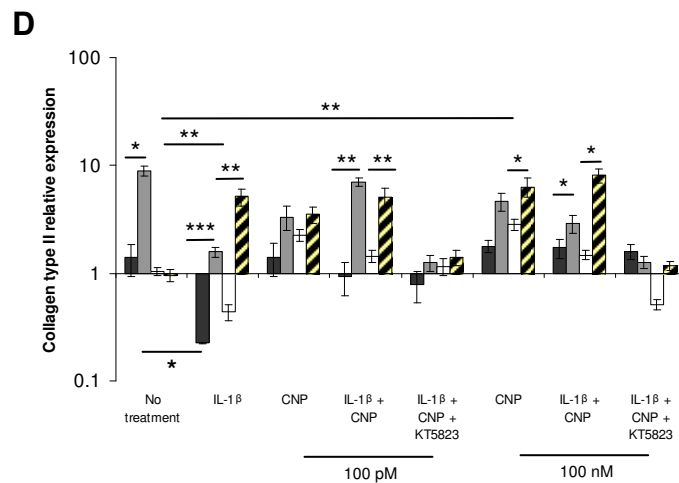

48 hour | □ Unstrained  
 | ▨ Strained

Supplement: MOESM4 [file 9694012]
